# Supplementary material for: Multimorbidity Profile of COVID-19 Deaths in Portugal during 2020
Source: MDPI journal article supplement (doi:10.3390/jcm11071898), 2022-03-29
Supplement: s1 [file s1]

## Multimorbidity Profile of COVID-19 Deaths in Portugal during 2020

Paulo Jorge Nogueira, Miguel de Araújo Nobre, Cecília Elias, Rodrigo Feteira-Santos, António Martinho, Catarina Camarinha Leonor Bacelar-Nicolau, Andreia Silva Costa, Cristina Furtado, Liliane Morais, Juan Rachadell, Mário Pereira Pinto, Fausto Pinto and António Vaz Carneiro

**Corresponding author:** Paulo Jorge Nogueira  
Faculdade de Medicina da Universidade de Lisboa  
Avenida Professor Egas Moniz  
1649-028 Lisboa  
pnogueira@medicina.ulisboa.pt

### Supplementary Material

|                                                                                                                                                                                                                        |   |
|------------------------------------------------------------------------------------------------------------------------------------------------------------------------------------------------------------------------|---|
| <b>Figure S1:</b> Weekly evolution of the Number of COVID-19 deaths, total (A) and by sex (B), and of new infected cases (C) in Portugal during 2020.....                                                              | 1 |
| <b>Figure S2:</b> Age distribution of COVID-19 deaths in Portugal during 2020.....                                                                                                                                     | 3 |
| <b>Figure S3:</b> Distribution of COVID-19 number of deaths and COVID-19 death rates by health administrative region (A and B), district (C and D) and municipality of residence (E and F) .....                       | 4 |
| <b>Figure S4:</b> Geographical distribution of COVID-19 deaths by municipalities in absolute number and Crude Mortality Rates for total population (A and B), men (C and D), and women (E and F), Portugal, 2020 ..... | 5 |
| <b>Table S1</b> Age distribution and comparison by characteristics .....                                                                                                                                               | 6 |
| <b>Table S2</b> Percentual presence of comorbidities (according to the Elixhauser Comorbidity Index) by Health Region of residence and by time-periods .....                                                           | 8 |
| <b>Table S3</b> Percentage of Elixhauser multimorbidity levels and Elixhauser weighted multimorbidity indexes highest levels by time-periods .....                                                                     | 9 |

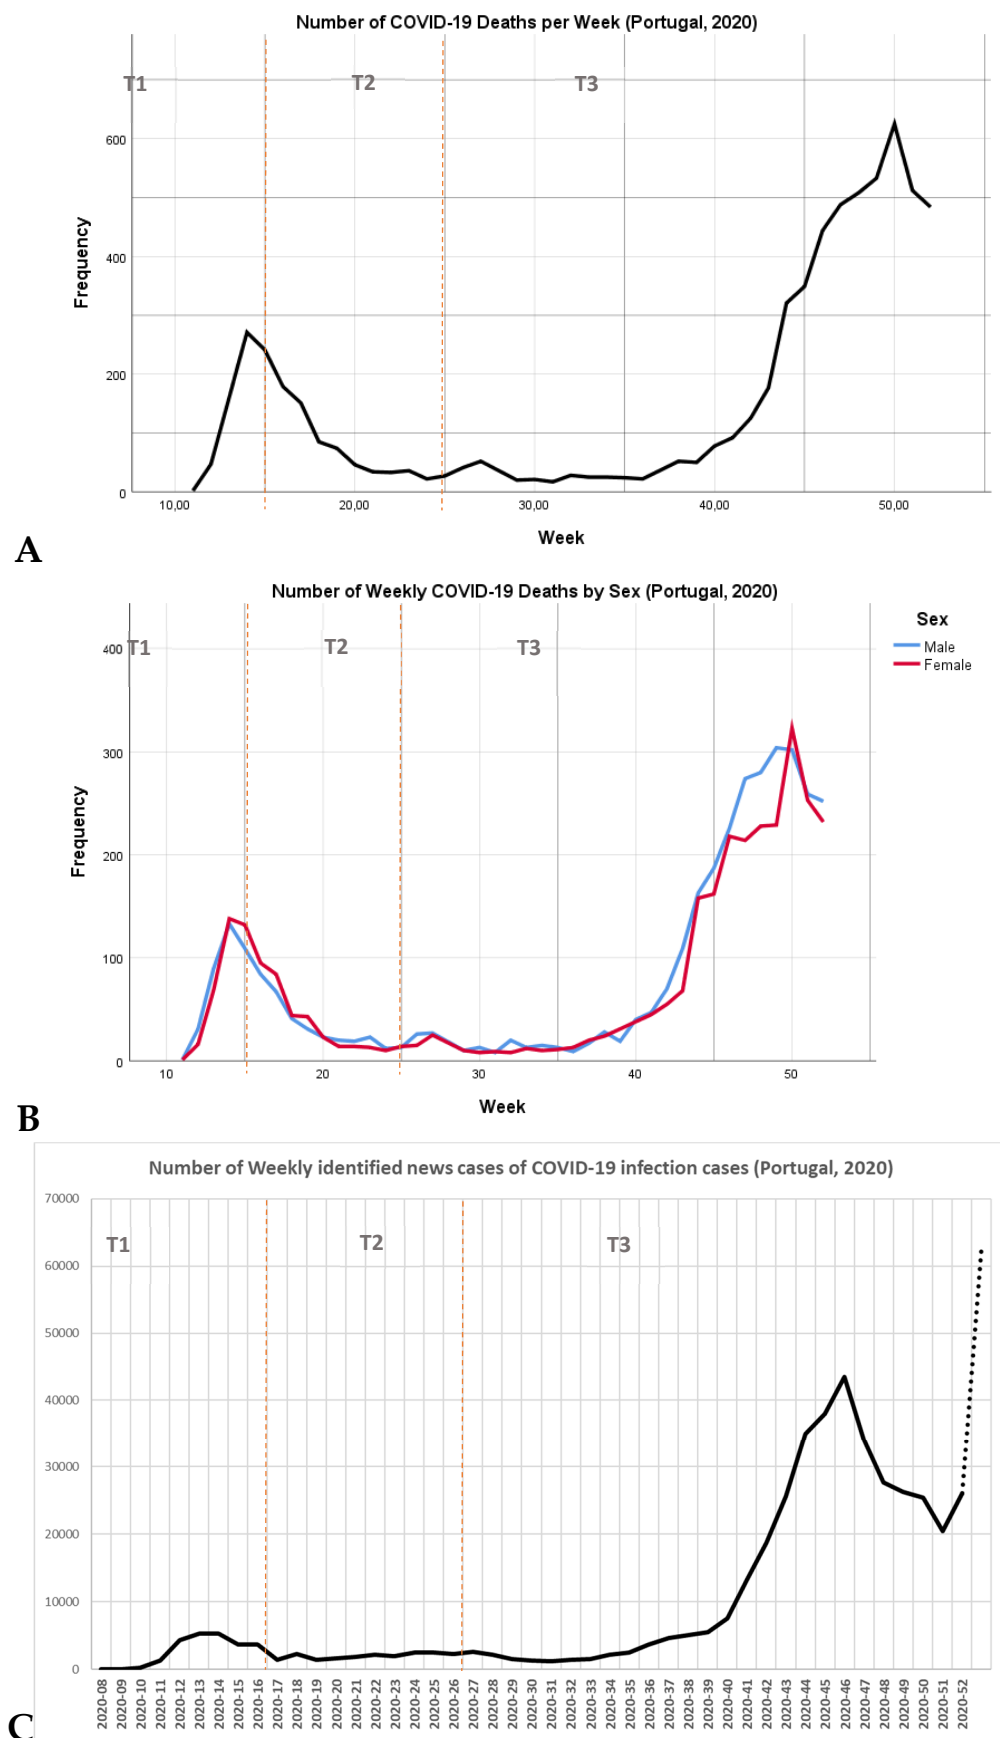

**Figure S1.** Weekly evolution of the Number of COVID-19 deaths, total (A) and by sex (B), and of new infected cases (C) in Portugal during 2020.

**Notes:** ISO Weeks numbers of 2020 are presented – week 53 is omitted because having only four days. **Abbreviations:** (T1) March 2 - June 2; (T2) June 3 - August 11; (T3) August 12 - December 31. Data source for (C): <https://github.com/CSSEGISandData>.

**Distribution of COVID-19 Deaths' Age (Portugal, 2020)**

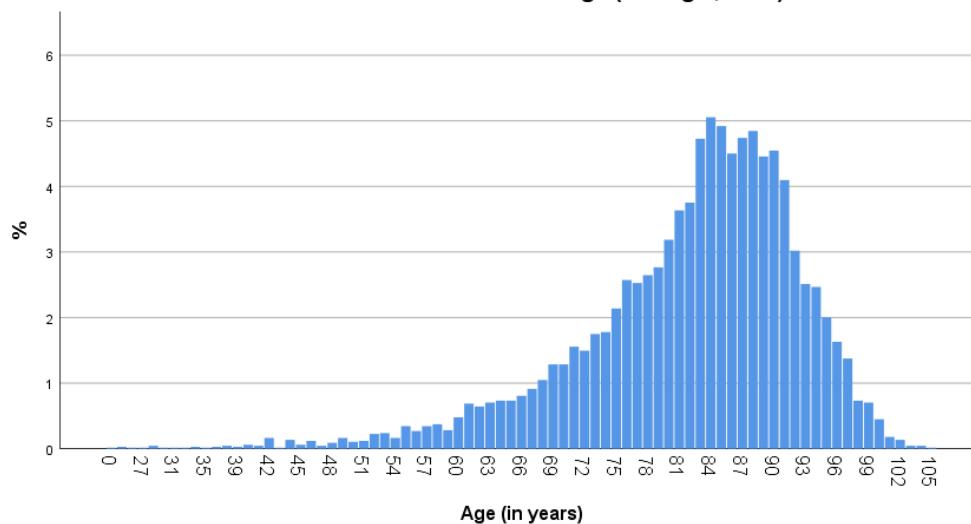

**A**

**Distribution of COVID-19 Deaths by Age Group (Portugal, 2020)**

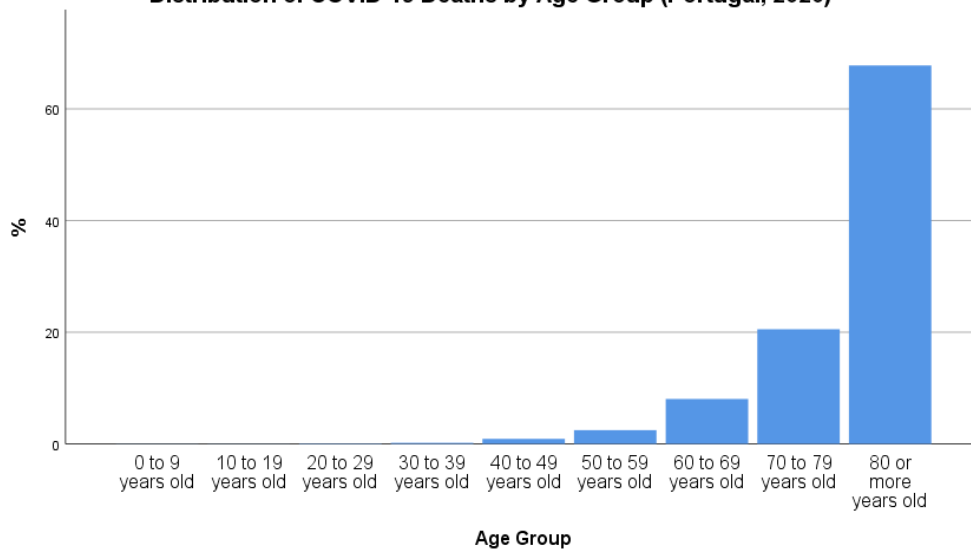

**B**

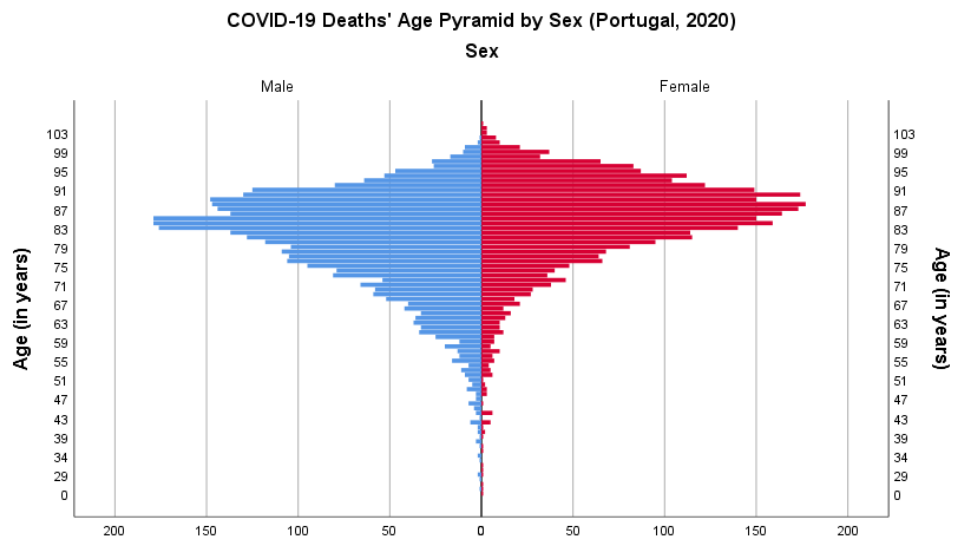

C

**Figure S2.** Age distribution of COVID-19 deaths in Portugal during 2020.

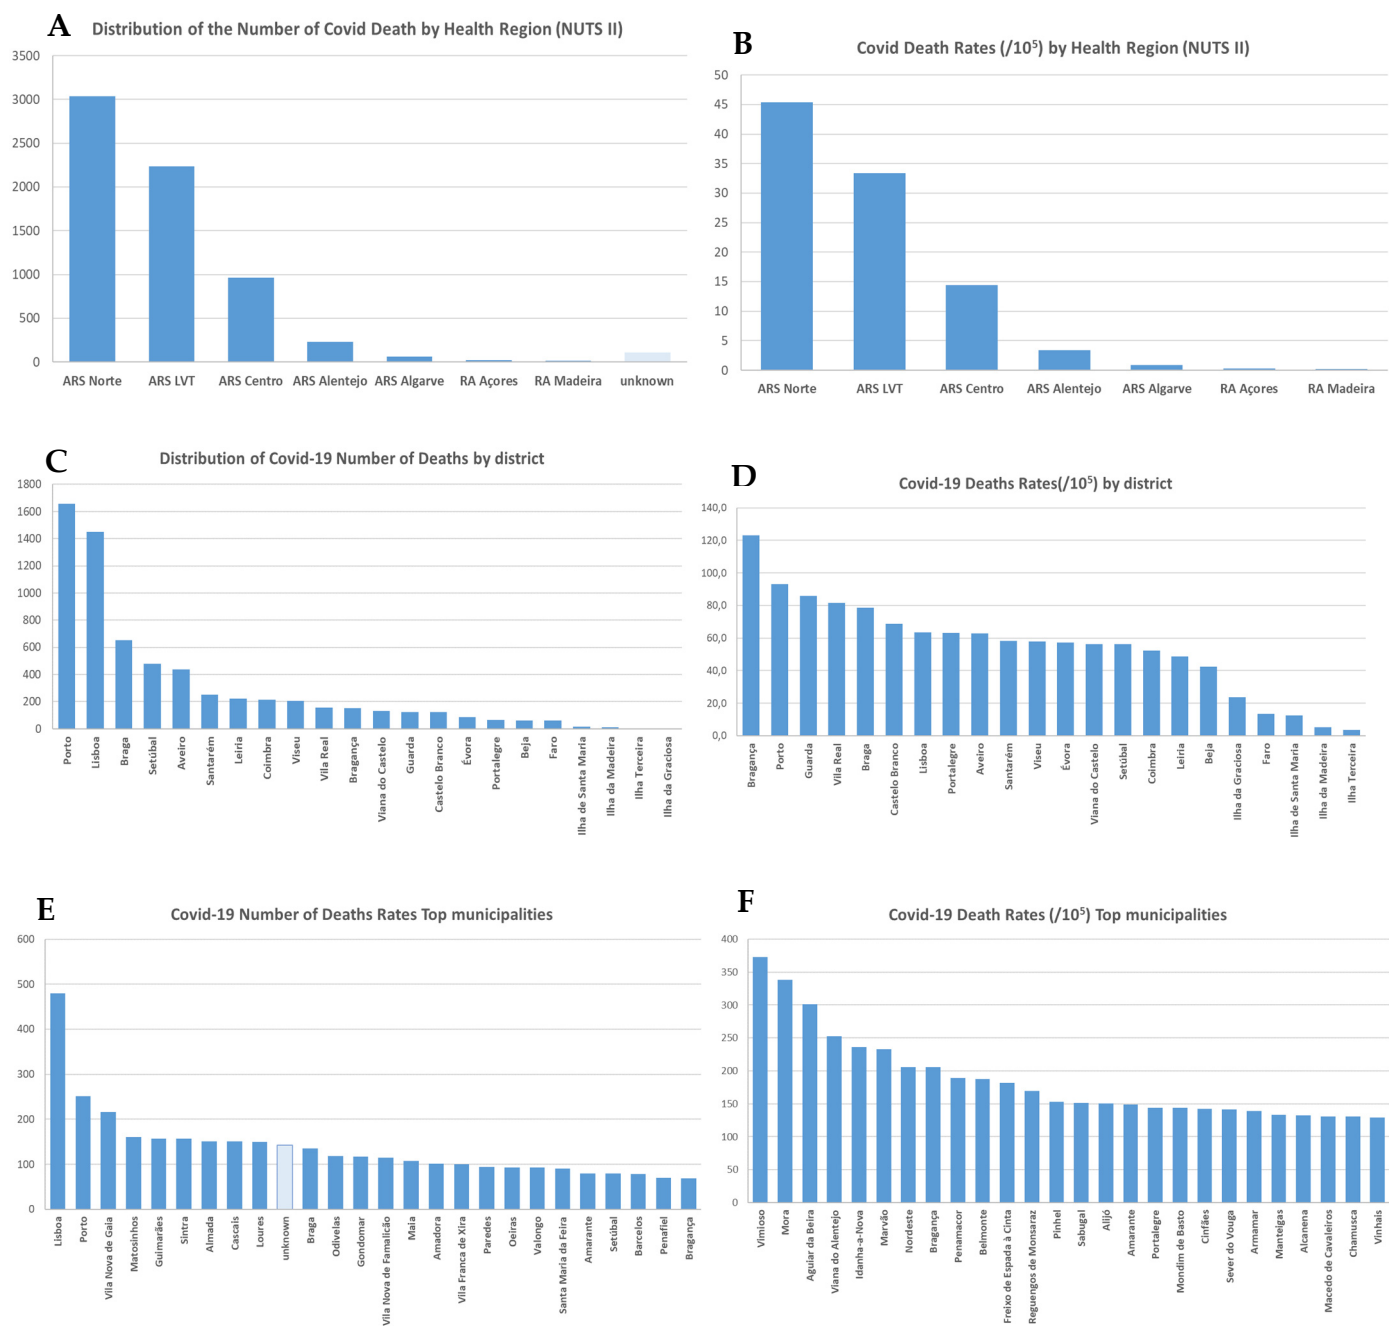

**Figure S3.** Distribution of COVID-19 number of deaths and COVID-19 death rates by health administrative region (A,B), district (C,D) and municipality of residence (E,F).

(A) Number of deaths by municipality

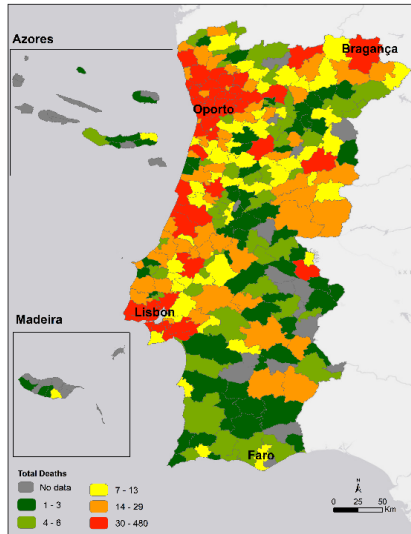

(B) CMR/100,000 inhab. by municipality

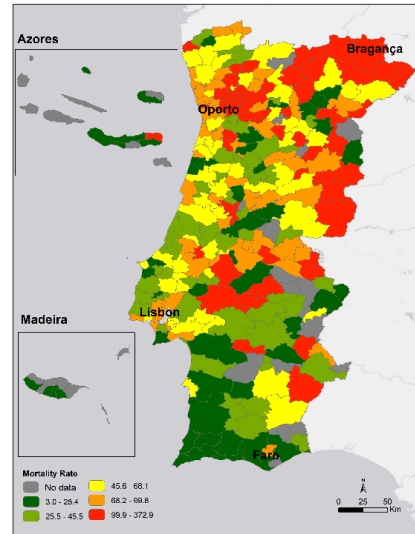

(C) Number of deaths by municipality - men

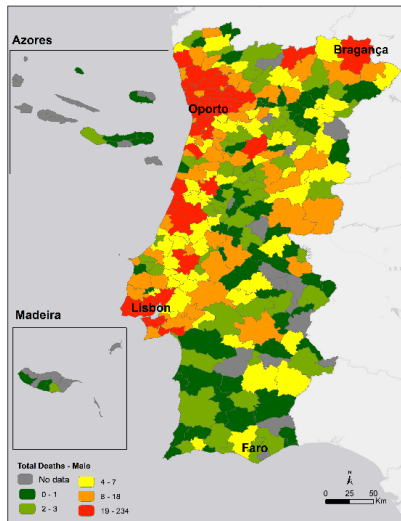

(D) CMR/100,000 men by municipality

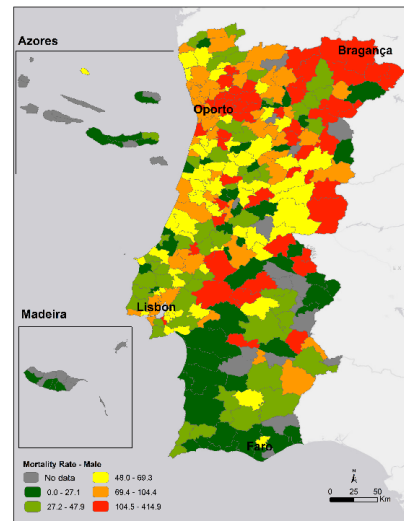

(E) Number of deaths by municipality - women

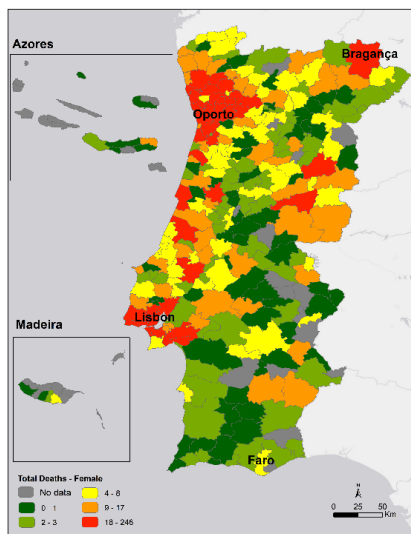

(F) CMR/100,000 women by municipality

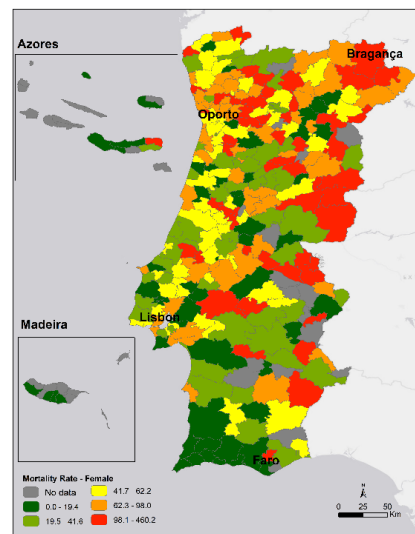

**Figure S4.** Geographical distribution of COVID-19 deaths by municipalities in absolute number and Crude Mortality Rates for total population (A,B), men (C,D), and women (E,F), Portugal, 2020.

**Table S1.** Age distribution and comparison by characteristics.

| Age Distribution by Sex           |        |      |                    |           |                     |      |         |         |
|-----------------------------------|--------|------|--------------------|-----------|---------------------|------|---------|---------|
| Sex                               | Median | Mean | Standard Deviation | Min - Max | 1st - 3rd Quartiles | n    | Missing | p-Value |
| Female                            | 86     | 84.3 | 9.9                | 0 - 105   | 80 - 91             | 3192 | 7       | <0.001  |
| Male                              | 82     | 79.9 | 10.7               | 19 - 102  | 74 - 88             | 3495 | 7       |         |
| Age distribution by age group     |        |      |                    |           |                     |      |         |         |
| Age groups                        | Median | Mean | Standard deviation | Min - Max | 1st - 3rd quartiles | n    | Missing | p-value |
| 0 to 9 years                      | 0      | 0    | -                  | 0 - 0     | 0 - 0               | 1    | 0       | <0.001  |
| 10 to 19 years                    | 19     | 19   | 0                  | 19 – 19   | 19 – 19             | 2    | 0       |         |
| 20 to 29 years                    | 29     | 28   | 1.4                | 26 – 29   | 27 – 29             | 5    | 0       |         |
| 30 to 39 years                    | 37     | 35.5 | 3.1                | 30 - 39   | 34 – 38             | 13   | 0       |         |
| 40 to 49 years                    | 45     | 45   | 2.9                | 40 – 49   | 42 – 48             | 60   | 0       |         |
| 50 to 59 years                    | 56     | 55.4 | 2.6                | 50 – 59   | 53 – 58             | 165  | 0       |         |
| 60 to 69 years                    | 66     | 65.2 | 2.9                | 60 – 69   | 63 – 68             | 537  | 0       |         |
| 70 to 79 years                    | 76     | 75.2 | 2.8                | 70 – 79   | 73 – 78             | 1372 | 0       |         |
| > 80 years                        | 87     | 87.8 | 4.9                | 80 – 105  | 84 – 91             | 4532 | 0       |         |
| Age distribution per district     |        |      |                    |           |                     |      |         |         |
| Districts                         | Median | Mean | Standard deviation | Min - Max | 1st - 3rd quartiles | n    | Missing | p-value |
| Aveiro                            | 84     | 81   | 11.3               | 29 – 102  | 75 – 89             | 439  | 142     | <0.001  |
| Beja                              | 87     | 85.2 | 9.7                | 45 – 99   | 81 – 92.2           | 60   | 142     |         |
| Braga                             | 84     | 81.8 | 10.5               | 42 – 104  | 76 – 89             | 651  | 143     |         |
| Bragança                          | 86     | 85.7 | 8.2                | 53 – 102  | 81 – 91             | 153  | 142     |         |
| Castelo Branco                    | 87     | 85.7 | 9.1                | 49 – 105  | 81 – 92             | 122  | 142     |         |
| Coimbra                           | 84.5   | 82.4 | 10.4               | 42 – 102  | 77 – 90             | 212  | 142     |         |
| Évora                             | 86.5   | 84   | 9.8                | 42 – 98   | 81.2 – 90           | 86   | 143     |         |
| Faro                              | 84     | 81   | 12.7               | 37 – 99   | 76.5 – 90           | 59   | 142     |         |
| Guarda                            | 87     | 86   | 8.3                | 41 – 104  | 82 – 91             | 123  | 142     |         |
| Leiria                            | 84     | 82.5 | 9.9                | 44 – 101  | 78 – 89             | 222  | 142     |         |
| Lisboa                            | 84     | 81.6 | 11.3               | 0 – 102   | 76 – 89             | 1449 | 144     |         |
| Portalegre                        | 85.5   | 84.4 | 8.6                | 61 – 102  | 80.2 – 90           | 66   | 142     |         |
| Porto                             | 83     | 81   | 10.6               | 19 – 103  | 75 – 88             | 1650 | 151     |         |
| Santarém                          | 84     | 83.6 | 9                  | 46 – 104  | 79 – 90             | 250  | 142     |         |
| Setúbal                           | 84     | 81.4 | 10.8               | 19 – 103  | 76 – 88             | 480  | 142     |         |
| Viana do Castelo                  | 85     | 84.3 | 8.2                | 44 – 98   | 81 – 90             | 130  | 142     |         |
| Vila Real                         | 84     | 83.2 | 9.3                | 55 – 99   | 77.5 – 90           | 155  | 143     |         |
| Viseu                             | 85     | 83.9 | 10.4               | 31 – 100  | 80 – 90             | 205  | 142     |         |
| Madeira Island                    | 87     | 85.6 | 8.9                | 64 – 97   | 80 – 91             | 13   | 142     |         |
| Santa Maria Island                | 84     | 80   | 13.8               | 48 – 99   | 73 – 90             | 17   | 142     |         |
| Terceira Island                   | 80.5   | 80.5 | 12                 | 72 – 89   | 76.2 – 84.8         | 2    | 142     |         |
| Graciosa Island                   | 47     | 47   | NA                 | 47 – 47   | 47 – 47             | 1    | 142     |         |
| Age distribution by health region |        |      |                    |           |                     |      |         |         |
| Health region                     | Median | Mean | Standard deviation | Min - Max | 1st - 3rd quartiles | n    | Missing | p-value |
| Unknown                           | 83     | 80.7 | 10.1               | 49 - 101  | 75 - 88             | 142  | 0       | <0.001  |
| ARS Alentejo                      | 87     | 84.7 | 9.3                | 42 - 103  | 81 - 90             | 227  | 1       |         |
| ARS Algarve                       | 84     | 81.0 | 12.7               | 37 - 99   | 76.5 - 90           | 59   | 0       |         |
| ARS Centro                        | 85     | 83.5 | 10.3               | 38 - 105  | 79 - 90             | 964  | 0       |         |
| ARS LVT                           | 84     | 81.7 | 10.9               | 0 - 104   | 76 - 89             | 2234 | 2       |         |

|                                                  |               |             |                           |                  |                            |          |                |                  |
|--------------------------------------------------|---------------|-------------|---------------------------|------------------|----------------------------|----------|----------------|------------------|
| ARS North                                        | 84            | 81.7        | 10.9                      | 19 - 104         | 76 - 89                    | 3028     | 11             |                  |
| ARA Açores                                       | 83            | 78.4        | 14.9                      | 47 - 99          | 71.5 - 89.2                | 20       | 0              |                  |
| ARA Madeira                                      | 87            | 85.6        | 8.9                       | 64 - 97          | 80 - 91                    | 13       | 0              |                  |
| <b>Age distribution by Death Place</b>           |               |             |                           |                  |                            |          |                |                  |
| <b>Death Place</b>                               | <b>Median</b> | <b>Mean</b> | <b>Standard deviation</b> | <b>Min - Max</b> | <b>1st - 3rd quartiles</b> | <b>n</b> | <b>Missing</b> | <b>p-value</b>   |
| Health Institution                               | 84            | 81.8        | 10.5                      | 0 - 104          | 76 - 89                    | 6079     | 4              |                  |
| At home                                          | 85            | 82.6        | 12                        | 37 - 101         | 79 - 90                    | 277      | 9              |                  |
| Nursing home                                     | 89            | 87.1        | 8.7                       | 60 - 105         | 83 - 93                    | 280      | 0              |                  |
| Private Health Institution                       | 80            | 80.6        | 6                         | 70 - 90          | 77 - 84.5                  | 11       | 0              | <b>&lt;0.001</b> |
| <i>Unknown</i>                                   | 87.5          | 84.2        | 12.8                      | 50 - 101         | 80.8 - 93                  | 40       | 1              |                  |
| <b>Age distribution by Basic Cause of deaths</b> |               |             |                           |                  |                            |          |                |                  |
| <b>Pandemic period</b>                           | <b>Median</b> | <b>Mean</b> | <b>Standard deviation</b> | <b>Min - Max</b> | <b>1st - 3rd quartiles</b> | <b>n</b> | <b>Missing</b> | <b>p-value</b>   |
| T1                                               | 84            | 82.0        | 10.8                      | 26 - 104         | 77 - 89                    | 1320     | 71             | 0.481            |
| T2                                               | 83            | 81.0        | 11.6                      | 38 - 101         | 75 - 89                    | 262      | 71             |                  |
| T3                                               | 84            | 82.2        | 10.5                      | 0 - 105          | 77 - 89                    | 5046     | 69             |                  |
| <b>Age distribution by Basic Cause of deaths</b> |               |             |                           |                  |                            |          |                |                  |
| <b>Basic Cause</b>                               | <b>Median</b> | <b>Mean</b> | <b>Standard deviation</b> | <b>Min - Max</b> | <b>1st - 3rd quartiles</b> | <b>n</b> | <b>Missing</b> | <b>p-value</b>   |
| U071 (laboratory confirmed)                      | 84            | 82.0        | 10.6                      | 0 - 105          | 77 - 89                    | 6598     | 12             |                  |
| U072 (laboratory unconfirmed)                    | 85            | 81.2        | 11.8                      | 38 - 99          | 79 - 88                    | 89       | 2              | 0.803            |

**Notes:** significant results are presented in bold font. **Abbreviations:** ARS, administrative region of health; RA, autonomous region. Periods: T1) March 2 - June 2; T2) June 3 - August 11; T3) August 12 - December 31.



**Table S2.** Percentual presence of comorbidities (according to the Elixhauser Comorbidity Index) by Health Region of residence and by time-periods.

| Conditions                                           | ARS<br>Alentejo | ARS<br>Algarve | ARS<br>Centro | ARS<br>LVT | ARS<br>Norte | RA<br>Azores | RA<br>Madeira | P <sup>a</sup> | T1    | T2    | T3    | P <sup>a</sup>   |
|------------------------------------------------------|-----------------|----------------|---------------|------------|--------------|--------------|---------------|----------------|-------|-------|-------|------------------|
| Hypertension,<br>uncomplicated                       | 25.44           | 34.43          | 27.67         | 30.13      | 30.88        | 10,00        | 61.54         | 0.068          | 28.59 | 31.82 | 30.22 | 0.537            |
| Diabetes,<br>uncomplicated                           | 18.42           | 21.31          | 15.69         | 16.39      | 17.46        | 0,00         | 7.69          | 0.322          | 15.28 | 18.94 | 17.00 | 0.265            |
| Congestive heart<br>failure                          | 9.65            | 14.75          | 13.78         | 15.24      | 14.51        | 10,00        | 15.38         | 0.501          | 14.75 | 11.74 | 14.53 | 0.487            |
| Renal failure                                        | 10.53           | 9.84           | 13.68         | 12.95      | 12.74        | 5,00         | 15.38         | 0.765          | 13.31 | 11.74 | 12.78 | 0.782            |
| Cardiac<br>arrhythmias                               | 7.89            | 16.39          | 10.97         | 10.35      | 10.82        | 10,00        | 7.69          | 0.600          | 10.59 | 7.95  | 10.74 | 0.399            |
| Chronic<br>pulmonary<br>disease                      | 6.58            | 8.20           | 6.84          | 7.14       | 7.22         | 5,00         | 15.38         | 0.944          | 6.73  | 6.82  | 7.25  | 0.804            |
| Solid tumor,<br>without<br>metastasis                | 7.89            | 8.20           | 6.24          | 7.36       | 7.06         | 5,00         | 0.00          | 0.882          | 6.66  | 9.85  | 6.96  | 0.193            |
| Obesity                                              | 7.02            | 9.84           | 4.02          | 4.67       | 5.84         | 0,00         | 7.69          | 0.076          | 4.77  | 4.92  | 5.37  | 0.676            |
| Other<br>neurological<br>disorders                   | 3.51            | 4.92           | 5.53          | 4.93       | 4.72         | 0,00         | 7.69          | 0.766          | 4.01  | 5.68  | 5.03  | 0.266            |
| Fluid and<br>electrolyte<br>disorders                | 3.07            | 4.92           | 4.12          | 3.96       | 3.66         | 0,00         | 15.38         | 0.388          | 2.95  | 6.06  | 3.94  | <b>0.043</b>     |
| Valvular disease                                     | 2.19            | 6.56           | 2.92          | 3.08       | 3.18         | 0,00         | 7.69          | 0.577          | 3.10  | 1.14  | 3.21  | 0.176            |
| Peripheral<br>vascular<br>disorders                  | 3.07            | 1.64           | 1.91          | 1.98       | 2.15         | 0,00         | 7.69          | 0.725          | 1.82  | 1.52  | 2.18  | 0.579            |
| Pulmonary<br>circulation<br>disorders                | 1.32            | 3.28           | 1.91          | 2.42       | 1.86         | 0,00         | 7.69          | 0.486          | 1.74  | 2.65  | 2.06  | 0.584            |
| Hypertension,<br>complicated                         | 1.75            | 3.28           | 1.61          | 2.47       | 1.83         | 0,00         | 0.00          | 0.584          | 1.44  | 3.41  | 2.10  | 0.086            |
| Hypothyroidism                                       | 3.51            | 1.64           | 1.21          | 2.20       | 1.67         | 0,00         | 0.00          | 0.245          | 1.59  | 3.03  | 1.82  | 0.285            |
| Metastatic<br>cancer                                 | 2.63            | 1.64           | 2.11          | 2.20       | 1.41         | 5,00         | 0.00          | 0.323          | 1.59  | 3.03  | 1.82  | 0.285            |
| Depression                                           | 2.19            | 0.00           | 1.41          | 1.45       | 1.86         | 0,00         | 15.38         | <b>0.007</b>   | 1.29  | 2.27  | 1.72  | 0.399            |
| Diabetes,<br>complicated                             | 2.19            | 0.00           | 1.51          | 1.59       | 1.41         | 0,00         | 0.00          | 0.890          | 1.13  | 0.38  | 1.64  | 0.128            |
| Liver disease                                        | 2.19            | 1.64           | 1.51          | 1.28       | 1.57         | 0,00         | 0.00          | 0.909          | 1.13  | 1.89  | 1.57  | 0.449            |
| Deficiency<br>anaemia                                | 1.32            | 0.00           | 1.61          | 1.15       | 1.28         | 0,00         | 0.00          | 0.869          | 1.21  | 0.00  | 1.37  | 0.155            |
| Rheumatoid<br>arthritis/collaged<br>vascular disease | 0.88            | 0.00           | 0.70          | 1.32       | 1.35         | 5,00         | 0.00          | 0.413          | 1.21  | 0.76  | 1.21  | 0.805            |
| Lymphoma                                             | 0.44            | 0.00           | 1.71          | 1.10       | 0.96         | 5,00         | 0.00          | 0.209          | 1.06  | 2.65  | 1.05  | 0.055            |
| Weight loss                                          | 0.88            | 0.00           | 0.91          | 1.06       | 0.83         | 0,00         | 0.00          | 0.957          | 0.68  | 3.41  | 0.83  | <b>&lt;0.001</b> |
| Coagulopathy                                         | 0.44            | 0.00           | 1.21          | 0.93       | 0.58         | 0,00         | 0.00          | 0.455          | 0.61  | 1.14  | 0.81  | 0.604            |
| Alcohol abuse                                        | 0.00            | 0.00           | 0.91          | 0.79       | 0.80         | 0,00         | 0.00          | 0.832          | 0.76  | 0.76  | 0.77  | 0.998            |

|                                                 |      |      |      |      |      |      |      |              |      |      |      |                  |
|-------------------------------------------------|------|------|------|------|------|------|------|--------------|------|------|------|------------------|
| <b>Psychoses</b>                                | 0.44 | 0.00 | 0.80 | 0.31 | 0.42 | 0,00 | 0.00 | 0.604        | 0.61 | 0.00 | 0.40 | 0.326            |
| <b>AIDS/HIV</b>                                 | 0.00 | 0.00 | 0.30 | 0.22 | 0.48 | 0,00 | 0.00 | 0.681        | 0.15 | 2.27 | 0.30 | <b>&lt;0.001</b> |
| <b>Paralysis</b>                                | 0.00 | 0.00 | 0.20 | 0.31 | 0.22 | 0,00 | 0.00 | 0.972        | 0.23 | 0.38 | 0.24 | 0.896            |
| <b>Peptic ulcer disease, excluding bleeding</b> | 0.00 | 0.00 | 0.30 | 0.04 | 0.19 | 0,00 | 0.00 | 0.651        | 0.23 | 0.00 | 0.12 | 0.529            |
| <b>Drug abuse</b>                               | 0.00 | 0.00 | 0.00 | 0.04 | 0.13 | 0,00 | 0.00 | 0.869        | 0.00 | 0.00 | 0.10 | 0.456            |
| <b>Blood loss anaemia</b>                       | 0.44 | 0.00 | 0.00 | 0.00 | 0.03 | 0,00 | 0.00 | <b>0.036</b> | 0.00 | 0.00 | 0.04 | 0.730            |

**Notes:** <sup>a</sup> Homogeneity test; significant results are presented in bold font. **Abbreviations:** ARS, administrative region of health; RA, autonomous region. Periods: T1) March 2 - June 2; T2) June 3 - August 11; T3) August 12 - December 31.

**Table S3.** Percentage of Elixhauser multimorbidity levels and Elixhauser weighted multimorbidity indexes highest levels by time-periods.

|                                   | Periods |      |      | p      |
|-----------------------------------|---------|------|------|--------|
|                                   | T1      | T2   | T3   |        |
| <b>Elixhauser score &gt; 1</b>    | 38.1    | 42   | 26.6 | <0.001 |
| <b>Elixhauser score &gt; 2</b>    | 20      | 20.1 | 14.5 | <0.001 |
| <b>Elixhauser score &gt; 3</b>    | 8.3     | 9.1  | 6.1  | 0.004  |
| <b>Elixhauser index ≥ 5</b>       | 3.2     | 4.2  | 2    | 0.004  |
| <b>Elixhauser Windex AHRQ ≥ 5</b> | 32.6    | 40.9 | 21.5 | <0.001 |
| <b>Elixhauser Windex VW ≥ 5</b>   | 34.8    | 39   | 23.2 | <0.001 |

**Notes:** Elixhauser score > k – individuals with at least k+1 Elixhauser comorbidities identified in the death certificate. **Abbreviations:** T1 - March 2 - June 2; T2 - June 3 - August 11; T3 - August 12 - December 31.
